# Supplementary material
Source: ML conference proceedings conference paper supplement (https://openaccess.thecvf.com/content/WACV_2020/html/Dias_Gaze_Estimation_for_WACV_2020_paper.html)
Supplement: Supplementary file 1 [file Dias_Gaze_Estimation_for_WACV_2020_supplemental.pdf › 0680-supp.pdf]

# Supplementary Material - Gaze Estimation for Assisted Living Environments

Philippe A. Dias<sup>1</sup>

Damiano Malafronte<sup>2</sup>

Henry Medeiros<sup>1</sup>

Francesca Odone<sup>3</sup>

<sup>1</sup>Marquette University (EECE), USA    <sup>2</sup>Italian Institute of Technology    <sup>3</sup>University of Genova (MaLGA-DIBRIS), Italy  
 {philipe.ambroziodias,henry.medeiros}@marquette.edu    damiano.malafronte@iit.it    francesca.odone@unige.it

## 1. Baseline *Geom*

For the following formulation, let  $N_x$  represent the X-coordinate of the nose,  $E_x^L$  represent the X-coordinate of the left eye, and  $A_y^R$  represent the Y-coordinate of the right ear. Additional variables are analogous, with superscripts  $\{R, L\}$  indicating right/left side, and subscripts  $\{x, y\}$  corresponding to the coordinates x and y, respectively.

### 1.1. Estimating facial normal

Inspired by the method described in the reference [13] of the main document, the first step of *Geom* consists of estimating the facial normal based on the available keypoints. Yet, differently from [13] that also requires mouth keypoints, in our case only eyes and nose coordinates are used.

Let  $E$  represent the eye-centroid computed as average of the right and left eyes  $E_x^R$  and  $E_x^L$ , respectively. The facial symmetry axis  $\vec{s}$  is approximated as a vector that is perpendicular to the eye-axis  $\overrightarrow{E^R E^L}$ , i.e.  $\vec{s} \cdot \overrightarrow{E^R E^L} = 0$ .

Then, the facial normal  $\vec{n}$  is estimated as a vector that is normal to  $\vec{s}$  and contains the nose  $N$ . To identify the coordinates of the point  $P$  where  $\vec{s}$  and  $\vec{n}$  intersect, a set of two dot product equations is used. As schematized in the following drawing,  $P$  is associated to  $E$  as summarized by Eq. 1:

$$\begin{aligned} dx &= \frac{E_x}{2}; \quad dy = \frac{E_y}{2}; \\ \tan\theta &= \frac{dy}{dx} = \frac{\beta}{\alpha} \rightarrow \beta = \alpha \frac{dy}{dx} \\ P &= (P_x, P_y) = (E_x, E_y) + (\beta, \alpha) \\ P &= (E_x, E_y) + \left( \alpha \frac{dy}{dx}, \alpha \right) \end{aligned} \quad (1)$$

Hence, to find  $P$  we can write the directions of  $\vec{s}$  and

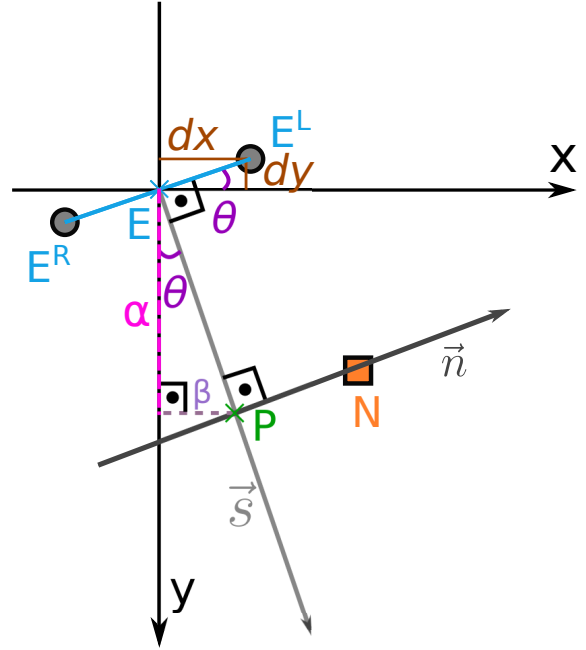

Figure 1. Computing facial symmetry axis  $\vec{s}$  and facial normal  $\vec{n}$ .

$\vec{n}$  as  $\overrightarrow{EP}$  and  $\overrightarrow{PN}$ , such that:

$$\begin{aligned} \vec{s} &= \overrightarrow{EP} = (P_x, P_y) - (E_x, E_y) \\ \overrightarrow{EP} &= (E_x, E_y) + \left( \alpha \frac{dy}{dx}, \alpha \right) - (E_x, E_y) \\ \overrightarrow{EP} &= \left( \alpha \frac{dy}{dx}, \alpha \right) \\ \vec{n} &= \overrightarrow{PN} = (N_x, N_y) - (P_x, P_y) \\ \overrightarrow{PN} &= (N_x, N_y) - (E_x, E_y) - \left( \alpha \frac{dy}{dx}, \alpha \right) \\ \overrightarrow{PN} &= \left( N_x - E_x - \alpha \frac{dy}{dx}, N_y - E_y - \alpha \right) \end{aligned} \quad (2)$$

Since  $\vec{n}$  is normal to  $\vec{s}$ , it follows that:

$$\begin{aligned}
\vec{s} \cdot \vec{n} &= 0 \rightarrow \overrightarrow{EP} \cdot \overrightarrow{PN} = 0 \\
\overrightarrow{EP} \cdot \overrightarrow{PN} &= \begin{bmatrix} \alpha \frac{dy}{dx} & \alpha \end{bmatrix} \cdot \begin{bmatrix} N_x - E_x - \alpha \frac{dy}{dx} \\ N_y - E_y - \alpha \end{bmatrix} = 0 \\
&= N_x \alpha \frac{dy}{dx} - E_x \alpha \frac{dy}{dx} - \alpha^2 \left( \frac{dy}{dx} \right)^2 \\
&\quad + N_y \alpha - E_y \alpha - \alpha^2 = 0 \\
&= \alpha^2 \left[ \left( \frac{dy}{dx} \right)^2 + 1 \right] \\
&\quad + \alpha \left[ E_x \frac{dy}{dx} - N_x \frac{dy}{dx} - N_y + E_y \right] = 0 \\
\alpha \left[ \left( \frac{dy}{dx} \right)^2 + 1 \right] &= - \left[ E_x \frac{dy}{dx} - N_x \frac{dy}{dx} - N_y + E_y \right] \\
\alpha &= \frac{\frac{dy}{dx}(N_x - E_x) + N_y - E_y}{\left( \frac{dy}{dx} \right)^2 + 1}
\end{aligned}$$

Once  $\alpha$  is obtained,  $P$  can be estimated using Eq.1 and thus the direction of the facial normal  $\vec{n}$  is approximated as  $\overrightarrow{PN}$ .

## 1.2. Estimating head pitch

The angle between ears and eyes allows an estimation of head pitch rotation (looking up or down). From the previous prediction using roll (eyes positions), the second step is to shift this prediction up/down according to this pitch estimation.

Let  $A$  represent the ear-centroid computed as average of the right and left ears  $A^R$  and  $A^L$ , respectively, while  $\omega$  represents the angle between  $A$  and the eye-centroid  $E$  that is used as pitch estimation. To apply the rotation  $R(\omega)$  matrix defined in Eq. 3, we can obtain  $\sin\omega$  and  $\cos\omega$  as

$$R(\omega) = \begin{bmatrix} \cos\omega & -\sin\omega \\ \sin\omega & \cos\omega \end{bmatrix} \quad (3)$$

$$\cos\omega = \frac{E_x - A_x}{\|\overrightarrow{AE}\|}; \quad \sin\omega = \frac{E_y - A_y}{\|\overrightarrow{AE}\|}, \quad (4)$$

such that the rotation matrix becomes

$$\begin{aligned}
R(\omega) &= \begin{bmatrix} \cos\omega & -\sin\omega \\ \sin\omega & \cos\omega \end{bmatrix} \\
&= \frac{1}{\|\overrightarrow{AE}\|} \begin{bmatrix} E_x - A_x & -E_y + A_y \\ E_y - A_y & E_x - A_x \end{bmatrix}.
\end{aligned}$$

Thus, gaze direction  $\vec{g}$  is estimated as

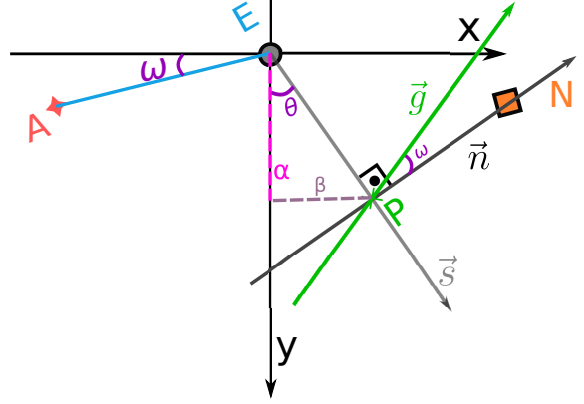

Figure 2. Illustration of how the pitch angle  $\omega$  is computed according to eyes and ears coordinates, and then applied to  $\vec{n}$  to estimate  $\vec{g}$ .

$$\tilde{\vec{g}} = R(\omega)\vec{n} = \frac{\overrightarrow{PN}}{\|\overrightarrow{AE}\|} \begin{bmatrix} E_x - A_x & -E_y - A_y \\ E_y - A_y & E_x - A_x \end{bmatrix}. \quad (5)$$

## 1.3. Cases of missing keypoints

The presented *Geom* method requires the detection of at least the nose and one eye for gaze estimation. Cases of missing keypoint detections are handled as:

- *one ear missing*- such cases mostly correspond to images where a lateral view of the subject's face is available. Predictions are done using the available complete pair eye-ear (either left or right) as replacement for the corresponding eye-centroid and ear-centroid;
- *one eye missing*- instead of using the eye-axis, the ear-axis is used to estimate the facial normal. Then, pitch is estimated using the available complete pair eye-ear (either left or right) as replacement for the corresponding eye-centroid and ear-centroid;
- *both ears not detected*- pitch is not estimated, so gaze is estimated using just the facial normal, i.e.  $\vec{g} = \vec{n}$ ;
